# Supplementary material for: Elimination of paternal mitochondria in mouse embryos occurs through autophagic degradation dependent on PARKIN and MUL1
Source: eLife. 2016 Nov 17;5:e17896. doi: 10.7554/eLife.17896 (PMC5127638; doi:10.7554/eLife.17896)
Supplement: Figure 5—source data 1. — Excel file containing source data for the plots in Figure 5B and D. DOI: http://dx.doi.org/10.7554/eLife.17896.011 [file elife-17896-fig5-data1.xlsx]

## Sheet: Figure 5B
		Non-targeting shRNA										p62 shRNA			Tbc1d15 shRNA			Pink1 shRNA			Parkin shRNA Mulan shRNA			Parkin shRNA			Mulan shRNA
	# of mitochondrial objects	expt 1	expt 2	expt 3	expt 4	expt 5	expt 6	expt 7	expt 8	expt 9	expt 10	expt 1	expt 2	expt 3	expt 1	expt 2	expt 3	expt 1	expt 2	expt 3	expt 1	expt 2	expt 3	expt 1	expt 2	expt 3	expt 1	expt 2	expt 3
Number of Embryos	0	38	3	10	38	4	8	2	4	6	8	7	3	1	9	2	5	3	1	4	0	1	2	7	7	14	5	17	11
	<5	13	2	1	13	1	1	1	2	3	8	17	1	1	6	2	0	3	1	6	4	1	4	8	3	5	4	8	6
	≥5	11	2	7	11	3	0	0	1	0	4	34	14	10	15	11	9	20	3	4	7	3	10	13	3	3	4	1	5
	TOTAL	62	7	18	62	8	9	3	7	9	20	58	18	12	30	15	14	26	5	14	11	5	16	28	13	22	13	26	22
Percent of Embryos	0	0.612903	0.428571	0.555556	0.612903	0.5	0.888889	0.666667	0.571429	0.666667	0.4	0.12069	0.166667	0.0833333	0.3	0.133333	0.357143	0.115385	0.2	0.285714	0	0.2	0.125	0.25	0.538462	0.636364	0.384615	0.653846	0.5
	<5	0.209677	0.285714	0.0555556	0.209677	0.125	0.111111	0.333333	0.285714	0.333333	0.4	0.293103	0.0555556	0.0833333	0.2	0.133333	0	0.115385	0.2	0.428571	0.363636	0.2	0.25	0.285714	0.230769	0.227273	0.307692	0.307692	0.272727
	≥5	0.177419	0.285714	0.388889	0.177419	0.375	0	0	0.142857	0	0.2	0.586207	0.777778	0.833333	0.5	0.733333	0.642857	0.769231	0.6	0.285714	0.636364	0.6	0.625	0.464286	0.230769	0.136364	0.307692	0.0384615	0.227273
	# of mitochondrial objects	Non-targeting shRNA	p62 shRNA	TBC1D15 shRNA	Pink1 shRNA	Parkin + Mulan shRNA	Parkin shRNA	Mulan shRNA
Average	None	0.590358	0.123563	0.263492	0.200366	0.108333	0.474942	0.512821
	<5	0.234912	0.143997	0.111111	0.247985	0.271212	0.247919	0.296037
	≥5	0.17473	0.732439	0.625397	0.551648	0.620455	0.27714	0.191142
Standard Deviation	None	0.139016	0.0417409	0.116285	0.0851654	0.101036	0.200861	0.135072
	<5	0.111872	0.129874	0.101835	0.162014	0.0838551	0.0327786	0.0201871
	≥5	0.145888	0.129652	0.117643	0.245358	0.0186031	0.168807	0.138204

## Sheet: Figure 5D
		mCherry			Fis1DN
	# of mitochondrial objects	expt 1	expt 2	expt 3	expt 1	expt 2	expt 3
Number of Embryos	0	8	9	12	1	4	2
	<5	3	0	5	0	3	6
	≥5	0	3	4	6	6	22
	TOTAL	11	12	21	7	13	30
Percent of Embryos	0	0.727273	0.75	0.571429	0.142857	0.307692	0.0666667
	<5	0.272727	0	0.238095	0	0.230769	0.2
	≥5	0	0.25	0.190476	0.857143	0.461538	0.733333
	# of mitochondrial objects	mCherry	Fis1DN
Average	None	0.6829	0.172405
	<5	0.170274	0.14359
	≥5	0.146825	0.684005
Standard Deviation	None	0.097204	0.1232
	<5	0.148475	0.1253
	≥5	0.130591	0.202363

## Sheet: Chi Square
CONTROL	Non-targeting shRNA	Percent
		0.590358
		0.234912
		0.17473
EXPERIMENTALS	Tbc1d15 shRNA	Observed	Expected	P value	graphpad
	0	16	34.8311	<.0001	Chi squared equals 75.386 with 2 degrees of freedom
	<5	8	13.8598
	>5	35	10.3091
	Total	59	59
	p62 shRNA
		11	51.9515	<.0001	Chi squared equals 155.784 with 2 degrees of freedom
		19	20.6722
		58	15.3762
		88	88
	Parkin shRNA Mulan shRNA
		3	18.8915	<.0001	Chi squared equals 46.712 with 2 degrees of freedom
		9	7.51717
		20	5.59136
		32	32
	Pink1 shRNA
		8	26.5661	<.0001	Chi squared equals 58.064 with 2 degrees of freedom
		10	10.571
		27	7.86285
		45	45
	Mulan shRNA
		33	36.0119	0.4762	Chi squared equals 1.484 with 2 degrees of freedom
		18	14.3296
		10	10.6585
		61	61
	Parkin shRNA
		28	37.1926	0.0177	Chi squared equals 8.074 with 2 degrees of freedom
		16	14.7994
		19	11.008
		63	63
CONTROL	mCherry	Percent
		0.6829
		0.170274
		0.146825
EXPERIMENTALS	Fis1DN	Observed	Expected	P value
		7	34.145	<.0001	Chi squared equals 125.584 with 2 degrees of freedom
		9	8.51371
		34	7.34127
		50	50
